# Supplementary material for: Imidazole-graphyne: a new 2D carbon nitride with a direct bandgap and strong IR refraction
Source: Royal Society of Chemistry journal article supplement (doi:10.1039/d1cp00800e), 2021-01-01
Supplement: d1cp00800e1.pdf [file d1cp00800e1.pdf]

Electronic supplementary information for

## Imidazole-graphyne: A new 2D carbon nitride with a direct bandgap and strong IR refraction

Wenyang Zhou,<sup>a,b,c</sup> Yaguang Guo,<sup>a,b</sup> Yiheng Shen,<sup>a,b</sup> Qian Wang,<sup>\*a,b</sup> and Puru Jena<sup>\*c</sup>

<sup>a</sup> Center for Applied Physics and Technology, HEDPS, College of Engineering, Peking University, Beijing, 100871, China

<sup>b</sup> School of Materials Science and Engineering, BKL-MEMD, Peking University, Beijing, 100871, China

<sup>c</sup> Department of Physics, Virginia Commonwealth University, Richmond, VA, 23284, USA

Corresponding author email: [qianwang2@pku.edu.cn](mailto:qianwang2@pku.edu.cn), [pjena@vcu.edu](mailto:pjena@vcu.edu)

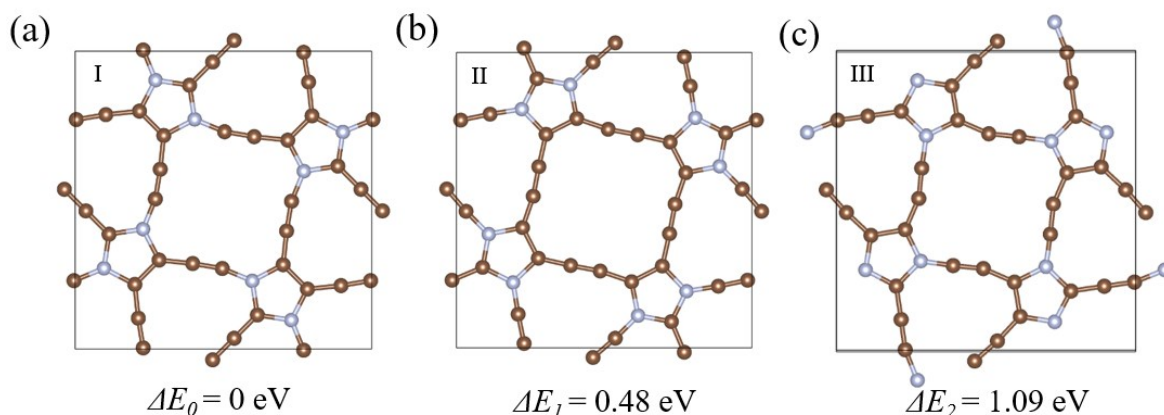

**Fig. S1** Three configurations of ID-GY with the relative energy  $\Delta E$  respective to configuration I. Brown and blue spheres represent C and N atoms, respectively.

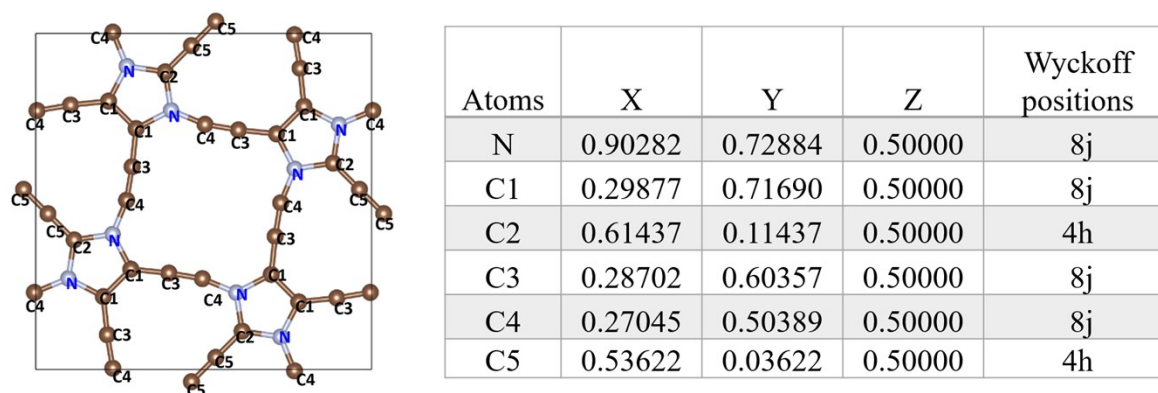

**Fig. S2** Inequivalent C atoms and N atom with Wyckoff positions in ID-GY. Brown and blue spheres represent C and N atoms, respectively.

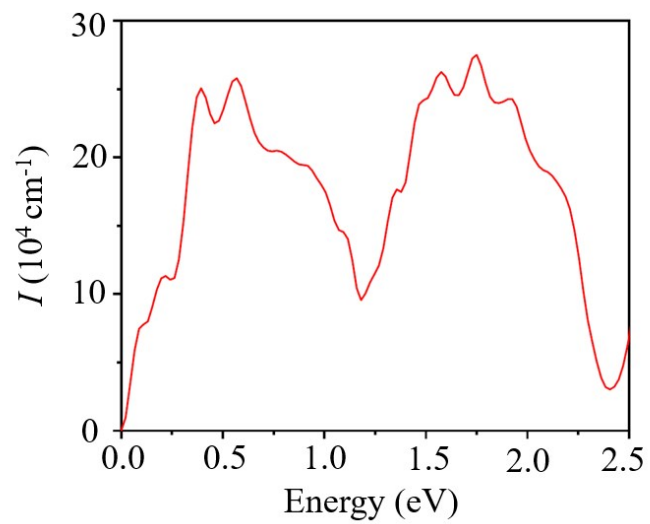

**Fig. S3** Absorption coefficient of cp-graphyne.
